# Supplementary material for: The relationship between suicide and violence in schizophrenia: Analysis of the Clinical Antipsychotic Trials of Intervention Effectiveness (CATIE) dataset
Source: PubMed Central journal article supplement — Schizophr Res. 2014 Apr;154(1-3):61–7. doi: 10.1016/j.schres.2014.02.001 (PMC3988953; doi:10.1016/j.schres.2014.02.001), 2014-04
Supplement: mmc1.pdf [file mmc1.pdf]

**Supplementary Table S1.**

Multivariate adjusted hazard ratios (aHR) and accompanying 95% confidence intervals for the risk of violent behavior in males and females with schizophrenia adjusted for demographic and clinical characteristics measured at randomization.

| Gender         | Risk Factor       | Duration of Illness<br>(Years) | Health Insurance<br>(Public v. Private) | Non-White<br>Ethnicity | Not Completed<br>High School<br>Education | Number Prior<br>Psychiatric<br>Admissions |
|----------------|-------------------|--------------------------------|-----------------------------------------|------------------------|-------------------------------------------|-------------------------------------------|
|                |                   | aHR (95% CI)                   | aHR (95% CI)                            | aHR (95% CI)           | aHR (95% CI)                              | aHR (95% CI)                              |
| <b>Males</b>   |                   |                                |                                         |                        |                                           |                                           |
|                | Suicidal ideation | 0.9 (0.6 – 1.5)                | 1.0 (0.7 – 1.6)                         | 1.0 (0.6 – 1.5)        | 1.0 (0.7 – 1.5)                           | 1.0 (0.6 – 1.5)                           |
|                | Suicidal threat   | 3.4 (2.1 – 5.5) ***            | 3.6 (2.3 – 5.7) ***                     | 3.7 (2.3 – 5.8) ***    | 3.8 (2.4 – 6.0) ***                       | 3.7 (2.4 – 5.8) ***                       |
|                | Suicide attempt   | 2.2 (1.1 – 4.4) *              | 2.6 (1.4 – 5.0) **                      | 2.6 (1.3 – 5.1) **     | 2.9 (1.5 – 5.5) **                        | 2.7 (1.4 – 5.2) **                        |
| <b>Females</b> |                   |                                |                                         |                        |                                           |                                           |
|                | Suicidal ideation | 0.4 (0.1 – 1.3)                | 0.4 (0.1 – 1.2)                         | 0.3 (0.1 – 1.1)        | 0.3 (0.1 – 1.2)                           | 0.3 (0.1 – 1.1)                           |
|                | Suicidal threat   | 10.5 (4.3 – 25.2) ***          | 8.6 (3.5 – 21.1) ***                    | 9.0 (4.0 – 20.5) ***   | 9.4 (4.1 – 21.7) ***                      | 9.4 (4.1 – 21.8) ***                      |
|                | Suicide attempt   | 4.5 (1.5 – 13.3) **            | 4.5 (1.6 – 13.0) **                     | 4.0 (1.4 – 11.6) *     | 4.3 (1.5 – 12.9) **                       | 4.7 (1.6 – 13.6) **                       |

**Note:** Duration of illness measured as the number of years between the first prescription for any antipsychotic medication until randomization into the CATIE trial. Public health insurance status includes both Medicare and Medicaid recipients. Number of prior psychiatric admissions measured over the lifetime.

\*\*\* = significant to the 0.001 level. \*\* = significant to the 0.01 level. \* = significant to the 0.05 level.
